# Supplementary material
Source: PubMed Central journal article supplement (PMC2867869)
Supplement: 1002758107_pnas.201002758SI.pdf [file 1002758107_pnas.201002758SI.pdf]

# Supporting Information

Meng et al. 10.1073/pnas.1002758107

## SI Materials and Methods

**Immunostaining and Alkaline Phosphatase Staining.** Immunofluorescence staining was performed as described previously (1). Primary antibodies were mouse monoclonal antibodies to  $\beta$ -tubulin III (TUJ1; Babco), AFP (Sigma-Aldrich), Gb3 (Seikagaku),  $\alpha$ -actinin (Sigma-Aldrich), cardiac troponin T (Thermo Fisher Scientific), SSEA1 (Santa Cruz Biotechnology), and rabbit polyclonal antibodies to GFAP (Dako), desmin (Sigma-Aldrich), GST- $\pi$  (MBL), GATA-4 (Santa Cruz Biotechnology), nestin (Abcam), and E-cadherin (Cell Signaling Technology). Cytochemical staining of alkaline phosphatase activity was performed using AP staining kit (Sigma-Aldrich) according to manufacturer's recommendation.

**Cardiomyocyte Differentiation and Treatment with Diltiazem.** EB formation in suspension culture was initiated as described above. After 4 days, EBs were collected and plated onto gelatin-coated 24-well plates (one EB per well) in differentiation medium. The medium was replaced every 2 days. The presence of spontaneous beating areas was monitored. Beating was observed 6 days after attachment. The beating areas were dissected under a microscope and seeded on gelatin-coated dishes or coverslips for further analysis. Some EBs with a beating frequency of  $\sim 30$  beats/min were treated with diltiazem (Sigma-Aldrich) at  $10^{-9}$  to  $10^{-4}$  M. Three independent EBs were analyzed for each concentration of diltiazem, and the beating frequency was monitored for 1 min after adding the drug.

**Neural Stem Cell Differentiation.** EB formation in suspension culture was induced and maintained in DMEM with 15% FBS, 2 mM L-glutamine, 0.1 mM nonessential amino acid, and 0.1 mM 2-mercaptoethanol for 4 days. Then medium was switched to neural basal medium (Invitrogen) supplemented with G-5 supplement (Invitrogen), 10 ng/mL of recombinant human basic fibroblast

growth factor (bFGF; Invitrogen), and 2 mM of L-glutamine for an additional 4 days. EBs were plated on gelatin-coated dishes and maintained in the foregoing medium for 8 days. The neural epithelium-like cells that migrated from EBs were harvested by mild trypsinization. The EBs were removed by settlement. Cells in the supernatant were seeded on collagen-coated dishes in neural basal medium supplemented with N2-supplement (Invitrogen), 200  $\mu$ M ascorbic acid (Sigma-Aldrich), and 10 ng/mL bFGF.

**GALC Enzyme Assay.** Homogenates (10  $\mu$ L) made in water were added to 20  $\mu$ L of substrate mixture consisting of 0.4 mM substrate, 0.3% sodium taurocholate, and 0.09% oleic acid in citric acid/phosphate buffer (pH 5.2). The enzymatic reaction was performed at 37  $^{\circ}$ C for 16 h in 200- $\mu$ L PCR tubes, and then was terminated by the addition of 0.2 M glycine-NaOH buffer (pH 10.7) with 0.2% SDS and Triton X-100. Fluorescence was measured at excitation wavelength at 360 nm and at emission wavelength at 448 nm. Activity was expressed as nmol/mg/16 h. Protein concentration was determined using BCA protein assay reagent (Pierce).

**Western Blot Analysis.** EBs in suspension cultures were collected on day 4, washed with PBS, and then lysed in RIPA buffer with protease inhibitor mixture (Santa Cruz Biotechnology). Clarified lysates (15  $\mu$ g protein) were denatured in sample buffer with 2.5% 2-mercaptoethanol at 98  $^{\circ}$ C for 5 min. Electrophoresis and Western blot analyses were performed as described previously (1). Primary antibodies used were rabbit polyclonal antibodies to CD44 (Santa Cruz Biotechnology) and E-cadherin (Cell Signaling Technology), mouse monoclonal antibodies to PCNA (Dako) and  $\beta$ -actin (Sigma-Aldrich), and rabbit monoclonal antibody to activated caspase-3 (Eptomics).

1. Shen JS, et al. (2008) Globotriaosylceramide induces oxidative stress and up-regulates cell adhesion molecule expression in Fabry disease endothelial cells. *Mol Genet Metab* 95:163–168.

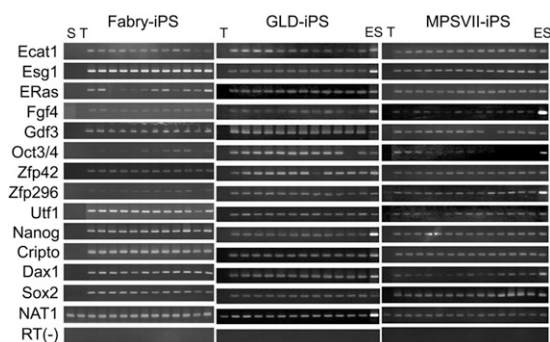

**Fig. S1.** Expression of ES marker genes in iPS cells. The expression of ES marker genes in these iPS cells was analyzed by RT-PCR. More than 10 iPS clones from each mouse model were analyzed. S, SNL feeder cells; T, tail-tip fibroblasts; ES, embryonic stem cells; RT(-), NAT1 PCR products amplified from cDNA samples without reverse transcriptase.
